# Supplementary material for: Design and selection of peptides to block the SARS-CoV-2 receptor binding domain by molecular docking
Source: publisher site journal article supplement (doi:10.3762/bjnano.13.62), 2022-07-22
Supplement: Additional file 1 [file 2190-4286-13-62-S1.pdf]

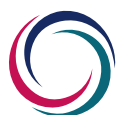

## Supporting Information

for

### **Design and selection of peptides to block the SARS-CoV-2 receptor binding domain by molecular docking**

Kendra Ramirez-Acosta, Ivan A. Rosales-Fuerte, J. Eduardo Perez-Sanchez, Alfredo Nuñez-Rivera, Josue Juarez and Ruben D. Cadena-Nava

*Beilstein J. Nanotechnol.* **2022**, *13*, 699–711. [doi:10.3762/bjnano.13.62](https://doi.org/10.3762/bjnano.13.62)

## Additional experimental data

**Table S1:** Summary of antiviral peptides used for initial docking; their known antiviral activity is listed. Information taken from the Antimicrobial Peptide Database (<https://aps.unmc.edu/database/anti>).

| APD ID  | PEPTIDE NAME                                            | ACTIVITY                                                                            |
|---------|---------------------------------------------------------|-------------------------------------------------------------------------------------|
| AP00013 | Aurein 1.2                                              | Anti-HIV                                                                            |
| AP00023 | Antiviral protein Y3                                    | Inhibition of Tobacco Mosaic Virus (TMV)                                            |
| AP00025 | Alloferon 1                                             | Inhibition of Herpes Simplex Virus (HSV)                                            |
| AP00026 | Lactoferricin B                                         | Anti-HIV                                                                            |
| AP00028 | Tricyclic peptide RP 71955                              | Anti-HIV                                                                            |
| AP00029 | Cecropin A(1-8)-Magainin 2(4-12) hybrid peptide (CE-MA) | Anti-HIV                                                                            |
| AP00058 | Maximin 1                                               | Anti-HIV                                                                            |
| AP00060 | Maximin 3                                               | Anti-HIV                                                                            |
| AP00061 | Maximim 4                                               | Anti-HIV                                                                            |
| AP00062 | Maximin 5                                               | Anti-HIV                                                                            |
| AP00074 | Brevinin-1                                              | Inhibition of Herpes Simplex Virus (HSV)                                            |
| AP00094 | Temporin A                                              | Active against Channel Catfish Virus (CCV) and Frog Virus 3 (FV3)                   |
| AP00095 | Temporin B                                              | Inhibition of Herpes Simplex Virus (HSV)                                            |
| AP00102 | Thanatin                                                | Inhibition of Tobacco Mosaic Virus (TMV)                                            |
| AP00121 | RANATUERIN 2P                                           | Active against Channel Catfish Virus (CCV) and Frog Virus 3 (FV3)                   |
| AP00139 | Cecropin A                                              | Anti-HIV                                                                            |
| AP00144 | Magainin 2                                              | Anti-HIV                                                                            |
| AP00146 | Melittin                                                | Inhibition of Herpes Simplex Virus (HSV-1 & HSV-2)                                  |
| AP00150 | Indolicidin                                             | Anti-HIV, Anti-HSV-1, Anti-HSV-2                                                    |
| AP00160 | Dermaseptin-S4                                          | Anti-HIV                                                                            |
| AP00173 | GNCP-2                                                  | Neutrophil. Generic antiviral activity is inferred.                                 |
| AP00174 | GNCP-1                                                  | Neutrophil. Generic antiviral activity is inferred.                                 |
| AP00176 | human neutrophil peptide-1                              | Anti-HIV. Active against Zika Virus.                                                |
| AP00177 | human neutrophil peptide-2                              | Inhibition of Herpes Simplex Virus (HSV-1 & HSV-2)                                  |
| AP00178 | human neutrophil peptide-3                              | Anti-HIV. Active against pseudo typed viruses expressing SARS-CoV-2 spike proteins. |
| AP00179 | human neutrophil peptide-4                              | Anti-HIV                                                                            |
| AP00180 | human defensin 5                                        | Inhibits non-enveloped BK virus infection.                                          |
| AP00181 | human defensin 6                                        | Human defensin. Innate antiviral activity is expected.                              |
| AP00187 | Rabbit neutrophil peptide 1                             | Neutrophil. Generic antiviral activity is inferred.                                 |
| AP00188 | Rabbit neutrophil defensin 2                            | Neutrophil. Generic antiviral activity is inferred.                                 |
| AP00195 | Protegrin 1                                             | Anti-HIV                                                                            |
| AP00211 | Polyphemusin I                                          | Anti-HIV                                                                            |
| AP00212 | Polyphemusin II                                         | Anti-HIV                                                                            |
| AP00214 | Tachyplesin I                                           | Anti-HIV, Anti-HSV-1, Anti-HSV-2                                                    |
| AP00217 | Rabbit neutrophil defensin 3a                           | Neutrophil. Generic antiviral activity is inferred.                                 |
| AP00218 | Protegrin 2                                             | Anti-HIV                                                                            |
| AP00219 | Protegrin 3                                             | Anti-HIV                                                                            |
| AP00220 | Protegrin 4                                             | Anti-HIV                                                                            |
| AP00221 | Protegrin 5                                             | Anti-HIV                                                                            |
| AP00222 | RatNP-1                                                 | Neutrophil. Generic antiviral activity is inferred.                                 |
| AP00223 | RatNP-2                                                 | Neutrophil. Generic antiviral activity is inferred.                                 |
| AP00224 | RatNP-3                                                 | Neutrophil. Generic antiviral activity is inferred.                                 |

|         |                                  |                                                                                      |
|---------|----------------------------------|--------------------------------------------------------------------------------------|
| AP00225 | RatNP-4                          | Neutrophil. Generic antiviral activity is inferred.                                  |
| AP00240 | Caerin 1.1                       | Anti-HIV                                                                             |
| AP00241 | Caerin 1.2                       | Anti-HIV                                                                             |
| AP00242 | Caerin 1.3                       | Anti-HIV                                                                             |
| AP00243 | Caerin 1.4                       | Anti-HIV                                                                             |
| AP00244 | Caerin 1.5                       | Anti-HIV                                                                             |
| AP00245 | Caerin 1.6                       | Anti-HIV                                                                             |
| AP00246 | Caerin 1.7                       | Anti-HIV                                                                             |
| AP00257 | Caerin 4.1                       | Anti-HIV                                                                             |
| AP00272 | mBD-1                            | A fusion construction of mBD-1 and mBD-3 is active against Influenza A Virus (IAV).  |
| AP00274 | Circulin A                       | Anti-HIV                                                                             |
| AP00275 | Circulin B                       | Anti-HIV                                                                             |
| AP00281 | mCRAMP                           | Inactivates Zika virus (ZIKV).                                                       |
| AP00283 | Human beta defensin 3            | Anti-HIV                                                                             |
| AP00310 | LL-37                            | Anti-HIV, Anti-HSV-1, Anti-HSV-2. Active against Zika virus and Dengue virus type 2. |
| AP00325 | Uperin 3.6                       | Anti-HIV                                                                             |
| AP00327 | Uperin 7.1                       | Anti-HIV                                                                             |
| AP00333 | Mytilin B                        | Related to innate antiviral immune response.                                         |
| AP00345 | Caerin 1.10                      | Anti-HIV                                                                             |
| AP00355 | Ginkbilobin                      | Anti-HIV                                                                             |
| AP00366 | BMAP-27                          | Anti-HIV                                                                             |
| AP00367 | BMAP-28                          | Anti-HSV-1                                                                           |
| AP00384 | Ponericin L2                     | Anti-HIV                                                                             |
| AP00399 | Spinigerin                       | Anti-HIV                                                                             |
| AP00405 | RANATUERIN 6                     | Anti-HIV                                                                             |
| AP00408 | RANATUERIN 9                     | Anti-HIV                                                                             |
| AP00445 | RTD-1                            | Active against HIV and SARS virus.                                                   |
| AP00446 | Alpha-basrubrin                  | Anti-HIV                                                                             |
| AP00449 | Alpha-MSH                        | Anti-HIV                                                                             |
| AP00451 | hBD-1                            | Anti-HIV                                                                             |
| AP00473 | Piscidin 1                       | Anti-HIV                                                                             |
| AP00474 | Piscidin 3                       | Active against Channel Catfish Virus (CCV).                                          |
| AP00499 | Gramicidin A                     | Anti-HIV                                                                             |
| AP00505 | human Histatin 5                 | Anti-HIV                                                                             |
| AP00524 | Human beta defensin 2 (monomero) | Anti-HIV                                                                             |
| AP00549 | Plectasin                        | Active against dengue virus type 2.                                                  |
| AP00553 | Sesquin                          | Anti-HIV                                                                             |
| AP00708 | GF-17                            | Anti-HIV                                                                             |
| AP00729 | Kalata B1                        | Anti-HIV                                                                             |
| AP00730 | Kalata B8                        | Anti-HIV                                                                             |
| AP00928 | Subtilosin A                     | Active against HSV-1 and HSV-2.                                                      |
| AP01010 | Latarcin 1                       | Active against dengue virus type 2.                                                  |
| AP01034 | Palicourein                      | Anti-HIV                                                                             |
| AP01049 | Kalata B2                        | Anti-HIV                                                                             |
| AP01058 | Vhl-1                            | Anti-HIV                                                                             |

|                |                             |                                                              |
|----------------|-----------------------------|--------------------------------------------------------------|
| <b>AP01065</b> | Cycloviolacin O14           | Anti-HIV                                                     |
| <b>AP01136</b> | Tricyclon A                 | Anti-HIV                                                     |
| <b>AP01208</b> | Retrocyclin-2               | Anti-HIV                                                     |
| <b>AP01382</b> | TEWP                        | Active against Chandipura virus.                             |
| <b>AP01406</b> | EP5-1                       | Active against pseudorabies virus (PRV).                     |
| <b>AP01580</b> | Elafin                      | Anti-HIV, Anti-HSV-1, Anti-HSV-2                             |
| <b>AP01654</b> | Caerin 1.19                 | Anti-HIV                                                     |
| <b>AP02095</b> | SLPI                        | Anti-HIV                                                     |
| <b>AP02099</b> | RNase 3                     | Active against respiratory syncytial virus, group B (RSV-B). |
| <b>AP02130</b> | Antiviral lectin scytovirin | Anti-HIV                                                     |
| <b>AP02131</b> | Cyanovirin-N                | Anti-HIV                                                     |
| <b>AP02132</b> | Microcystis viridis lectin  | Anti-HIV                                                     |
| <b>AP02133</b> | Griffithsin                 | Anti-HIV                                                     |
| <b>AP02146</b> | ALFpm3                      | Active against White Spot Syndrome Virus (WSSV).             |
| <b>AP02337</b> | RNase 2                     | Active against respiratory syncytial virus (RSV).            |

**Table S2:** Molecular docking scores of the 104 peptides using AutoDock Vina. The table shows the biochemical properties and the peptide's organism of origin.

| Peptide               | Sequence fragment | PDB/<br><i>UNIPRO</i> | Residues | Sequence                                    | Affinity<br>(kcal/mol) | H bonds/<br>Residues | Organism of<br>origin                                      |
|-----------------------|-------------------|-----------------------|----------|---------------------------------------------|------------------------|----------------------|------------------------------------------------------------|
| Alpha-Basrubrin       | 1-20              | P83186                | 20       | GADFQECMKEHSQKQHQQG                         | -5.2                   | 0.95                 | <i>Basella alba</i>                                        |
| Human Beta Defensin 3 | 27-45             | 1KJ6                  | 19       | EEQIGKCSRGRKCCRRKK                          | -5.0                   | 0.95                 | <i>Homo sapiens</i>                                        |
| Sesquin               | 1-10              | P84868                | 10       | KTCENLADTY                                  | -5.6                   | 0.80                 | <i>Vigna unguiculata</i><br>subsp.<br><i>sesquipedalis</i> |
| Indolicidin           | 1-13              | 1G89                  | 13       | ILPWKWPWWPWR                                | -8.0                   | 0.77                 | N/A                                                        |
| BMAP-28               | 1-18              | 2NDC                  | 18       | GGLRSLGRKILRAWKKYPIIPIIRIG                  | -4.4                   | 0.77                 | <i>Bos taurus</i>                                          |
| GF-17                 | 1-17              | 2L5M                  | 17       | GFKRIVQRIKDFLRNLV                           | -5.3                   | 0.76                 | synthetic<br>construct                                     |
| Cyanovirin-N (70-80)  | 70-80             | 2EZM                  | 10       | AAECKTRAQQ                                  | -5.3                   | 0.73                 | <i>Nostoc ellipsosporum</i>                                |
| Protegrin 5           | 1-18              | 2NC7                  | 18       | RGGRLCYCRPRFCVCGR                           | -7.2                   | 0.72                 | <i>Sus scrofa</i><br>(Porcine)                             |
| MVL (94-110)          | 94-110            | 1ZHS                  | 17       | GQWRTIVEGVMSVIQIK                           | -5.0                   | 0.71                 | <i>Microcystis viridis</i>                                 |
| Temporin B            | 1-13              | 6GIL                  | 13       | LLPIVGNLLKSL                                | -5.6                   | 0.69                 | <i>Rana temporaria</i>                                     |
| Dermaseptin-S4        | 1-13              | 2DD6                  | 13       | ALWKTLLKKVLKA                               | -5.5                   | 0.69                 | N/A                                                        |
| MVL (74-87)           | 74-87             | 1ZHS                  | 14       | NDEAQLGPQIAAS                               | -5.9                   | 0.64                 | <i>Microcystis viridis</i>                                 |
| MVL (16-34)           | 16-34             | 1ZHS                  | 19       | AEAQQVGPKIAAAHQGNFT                         | -5.8                   | 0.63                 | <i>Microcystis viridis</i>                                 |
| ACE2                  | 21-44             | 6VYB                  | 24       | IEEQAKTFLDKFNHEAEDLFYQSS                    | -4.6                   | 0.63                 | <i>Homo sapiens</i>                                        |
| RTD-1                 | 1-18              | 2LYF                  | 18       | GFCRCLCRRGVCRCICTR                          | -7.1                   | 0.61                 | N/A                                                        |
| Spinigerin            | 1-25              | 1ZRV                  | 25       | HVDKKVADKVLKQLRIMRLTRL                      | -5.0                   | 0.6                  | N/A                                                        |
| RNase 3               | 33-42             | 2BZZ                  | 10       | NYQRCKNQ                                    | -6.0                   | 0.6                  | <i>Homo sapiens</i>                                        |
| Protegrin 1           | 1-18              | 1PG1                  | 18       | RGGRLCYCRRRFCVCGR                           | -6.9                   | 0.56                 | <i>Sus scrofa</i>                                          |
| LL-37 core            | 17-29             | 2K6O                  | 13       | FKRIVQRIKDFLR                               | -4.8                   | 0.54                 | <i>Homo sapiens</i>                                        |
| Latarcin 1            | 1-26              | 2PCO                  | 26       | SMWSGMWRRKLLKLRNALKKLKG<br>EK               | -4.5                   | 0.54                 | N/A                                                        |
| Gramicidin A          | 1-15              | 1MAG                  | 15       | VGALAVVWLWLWLW                              | -6.4                   | 0.53                 | <i>Brevibacillus brevis</i>                                |
| MVL (64-82)           | 64-82             | 1ZHS                  | 19       | TDVLAGPLWSNDEAQLGP                          | -5.0                   | 0.53                 | <i>Microcystis viridis</i>                                 |
| Piscidin 1            | 1-22              | 2JOS                  | 22       | FFHHIFRGIVHVGKTIHRLVTG                      | -5.3                   | 0.5                  | N/A                                                        |
| Human Histatin 5      | 1-24              | P15516                | 24       | DSHAKRHHGYKRKFHEKHHSHRGY                    | -4.4                   | 0.5                  | <i>Homo sapiens</i>                                        |
| ALC (51-90)           | 51-90             | 2QT4                  | 40       | GPTYCWDEAKNPGGPNRCSNSKQCD<br>GARTCSSSGFCQGT | -5.1                   | 0.5                  | <i>Scytonema varium</i>                                    |
| MVL (35-42)           | 35-42             | 1ZHS                  | 8        | GQWTTVVE                                    | -6.1                   | 0.5                  | <i>Microcystis viridis</i>                                 |
| MVL (60-74)           | 60-74             | 1ZHS                  | 15       | HEFKTDVLAGPLWSN                             | -4.6                   | 0.47                 | <i>Microcystis viridis</i>                                 |
| Tachyplexin 1         | 1-17              | 1W01                  | 17       | KWCFRVCYRGICYRRCR                           | -5.9                   | 0.47                 | <i>Tachypleus tridentatu</i>                               |
| Alpha-MSH             | 1-13              | P01190                | 13       | SYSMEHFRWGKP                                | -5.7                   | 0.46                 | <i>Bos taurus</i>                                          |
| MVL (10-30)           | 10-30             | 1ZHS                  | 20       | GPLWSNAEAQQVGPKIAAAH                        | -6.1                   | 0.45                 | <i>Microcystis viridis</i>                                 |
| MVL (42-57)           | 42-57             | 1ZHS                  | 16       | ESAMSVVEVELQVENT                            | -5.2                   | 0.44                 | <i>Microcystis viridis</i>                                 |
| Protegrin 2           | 1-16              | 2MUH                  | 16       | RGGRLCYCRRRFCV                              | -6.5                   | 0.44                 | <i>Sus scrofa</i>                                          |
| Protegrin 4           | 1-18              | 6QKF                  | 18       | RGGRLCYCRGWICFCVGR                          | -7.0                   | 0.44                 | <i>Sus scrofa</i>                                          |
| Ranatuerin-9          | 1-14              | P82824                | 14       | FLFPLITSFLSKVL                              | -5.8                   | 0.43                 | <i>Lithobates catesbeianus</i>                             |

|                                     |       |        |    |                                              |       |      |                                |
|-------------------------------------|-------|--------|----|----------------------------------------------|-------|------|--------------------------------|
| <b>Caerin 1.7</b>                   | 1-24  | P62548 | 24 | GLFKVLGSAKHLHPHVPVIAEK                       | -5.5  | 0.42 | <i>Ranoidea xanthomera</i>     |
| <b>BMAP-27</b>                      | 1-27  | 2KET   | 27 | GRFKRFRKKFKLKKLSPVIPLHLG                     | -4.0  | 0.41 | <i>Bos taurus</i>              |
| <b>Caerin 1.5</b>                   | 1-25  | P56230 | 25 | GLLSVLGSAKHLHPHVPVIAEHL                      | -4.3  | 0.4  | <i>Ranoidea caerulea</i>       |
| <b>Retrocyclin-2</b>                | 1-18  | 2LZI   | 18 | GICRCICGRRICRCICGR                           | -7.4  | 0.39 | N/A                            |
| <b>Caerin 1.6</b>                   | 1-24  | P62546 | 24 | GLFSVLGAVAKHVLPHVVPVIAEK                     | -5.4  | 0.38 | <i>Ranoidea xanthomera</i>     |
| <b>Piscidin 3</b>                   | 1-22  | 2MCX   | 22 | FIHHIFRGIVHAGRSIGRFLTG                       | -5.7  | 0.36 | <i>Morone chrysops</i>         |
| <b>Caerin 4.1</b>                   | 1-23  | P56242 | 23 | GLWQKIKSAAGDLASGIVEGIKS                      | -4.1  | 0.35 | <i>Ranoidea caerulea</i>       |
| <b>Uperin 3.6</b>                   | 1-17  | P82050 | 17 | GVDLIRKAVSVIKNIV                             | -5.0  | 0.35 | <i>Litoria ewingii</i>         |
| <b>GNCP-2</b>                       | 1-32  | P49112 | 32 | GRRICITTRTCRFPYRRLGTCLFQNRV<br>YTFCC         | -5.5  | 0.34 | <i>Cavia porcellus</i>         |
| <b>NCP 2</b>                        | 61-93 | P49112 | 32 | GRRICITTRTCRFPYRRLGTCLFQNRV<br>YTFCC         | -5.5  | 0.34 | <i>Cavia porcellus</i>         |
| <b>RNase 3 (beta)</b>               | 38-46 | 1H1H   | 9  | CKNQNTFLR                                    | -10.8 | 0.33 | <i>Homo sapiens</i>            |
| <b>Griffithsin</b>                  | 19-36 | 2GTY   | 18 | LSSIAVRLYSGSDAIID                            | -5.3  | 0.33 | <i>Griffithsia</i>             |
| <b>Caerin 1.1</b>                   | 1-25  | P62568 | 25 | GLLSVLGSAKHLHPHVPVIAEHL                      | -5.1  | 0.32 | <i>Ranoidea splendida</i>      |
| <b>Caerin 1.19.3</b>                | 7-25  | POC2A8 | 19 | GSVAKHLHPHVPVIAEKL                           | -5.6  | 0.32 | <i>Ranoidea gracilenta</i>     |
| <b>Rabbit neutrophil peptide 1</b>  | 1-31  | P07469 | 31 | ICACRRRFPNSERFSGYCRVNGARYV<br>RCCS           | -4.4  | 0.32 | <i>Oryctolagus cuniculus</i>   |
| <b>Corticostatin 1</b>              | 61-91 | P07469 | 31 | ICACRRRFPNSERFSGYCRVNGARYV<br>RCCS           | -4.4  | 0.32 | <i>Oryctolagus cuniculus</i>   |
| <b>Uperin 7.1</b>                   | 1-13  | P82050 | 13 | GWFDVVKHIASAV                                | -5.6  | 0.31 | <i>Litoria ewingii</i>         |
| <b>Ranatuerin-6</b>                 | 1-13  | P82821 | 13 | FISAIASMLGKFL                                | -6.6  | 0.31 | <i>Lithobates catesbeianus</i> |
| <b>Rabbit neutrophil defensin 2</b> | 1-32  | P07468 | 32 | RCVCRKQLLCSYRERRIGDCKIRGVRF<br>PFCCP         | -4.4  | 0.31 | <i>Oryctolagus cuniculus</i>   |
| <b>Corticostatin 2</b>              | 2-33  | P07468 | 32 | RCVCRKQLLCSYRERRIGDCKIRGVRF<br>PFCCP         | -4.4  | 0.31 | <i>Oryctolagus cuniculus</i>   |
| <b>Ginkbilobin</b>                  | 1-40  | P83171 | 40 | ANTAFVSSAHNTQKIPAGAPFNRNLR<br>AMLADLRQNAAFAG | -3.1  | 0.28 | <i>Ginkgo biloba</i>           |
| <b>Caerin 1.4</b>                   | 1-25  | P62544 | 25 | GLLSSLSSVAKHVLPHVVPVIAEHL                    | -5.7  | 0.28 | <i>Ranoidea gilleni</i>        |
| <b>ALC (3-42)</b>                   | 3-42  | 2QT4   | 40 | GPTYCWNEANNGPGPNRCCSSSGFCC<br>QKNNSDGARTQGTS | -4.7  | 0.28 | <i>Scytonema varium</i>        |
| <b>Polyphemusin 1</b>               | 1-18  | 1RKK   | 18 | RRWCFRVCYRGFCYRKCR                           | -5.5  | 0.28 | <i>Synthetic construct</i>     |
| <b>Protegrin 3</b>                  | 1-18  | 2MZ6   | 18 | RGGGLCYCRRRFCVCVGR                           | -6.2  | 0.28 | <i>Sus scrofa</i>              |
| <b>mCRAMP</b>                       | 1-34  | P51473 | 34 | GLLRKGGEKIGEKLLKIGQKIKNFFQK<br>LVPQPEQ       | -3.5  | 0.26 | <i>Xenopus laevis</i>          |
| <b>RatNP-2</b>                      | 1-31  | Q62715 | 31 | TCYCRSTRCGFRERLSGACGYRGRIYR<br>LCCR          | -3.9  | 0.26 | <i>Rattus norvegicus</i>       |
| <b>RatNP-4</b>                      | 1-31  | Q62714 | 31 | ACYCRIGACVSGERLTGACGLNGRIYRL<br>CCR          | -4.3  | 0.26 | <i>Rattus norvegicus</i>       |
| <b>RNase 3 (1-19)</b>               | 1-19  | 1H1H   | 19 | RPPQFTRAQWFIAIQHISLN                         | -10.1 | 0.26 | <i>Homo sapiens</i>            |
| <b>Caerin 1.10</b>                  | 1-25  | P82104 | 25 | GLLSVLGSAKHLHPHVPVIAEKL                      | -4.2  | 0.24 | <i>Ranoidea splendida</i>      |
| <b>Caerin 1.2</b>                   | 1-25  | P56227 | 25 | GLLGVLGSAKHLHPHVPVIAEHL                      | -4.8  | 0.24 | <i>Ranoidea caerulea</i>       |
| <b>Caerin 1.3</b>                   | 1-25  | P56228 | 25 | GLLSVLGSAQHVLPHVVPVIAEHL                     | -4.7  | 0.24 | <i>Ranoidea caerulea</i>       |
| <b>Cyanovirin-N (40-56)</b>         | 40-56 | 2EZM   | 17 | IENVDSGLKQWPSNFIE                            | -5.4  | 0.24 | <i>Nostoc elliposporum</i>     |
| <b>GNCP-1</b>                       | 1-30  | Q64365 | 30 | RCICTTRTCRFPYRRLGTCLFQNRVYT<br>FCC           | -4.7  | 0.23 | <i>Cavia porcellus</i>         |
| <b>NCP 1 type B</b>                 | 64-93 | Q64365 | 30 | RCICTTRTCRFPYRRLGTCLFQNRVYT<br>FCC           | -4.7  | 0.23 | <i>Cavia porcellus</i>         |

|                                     |       |        |    |                                                       |       |       |                              |
|-------------------------------------|-------|--------|----|-------------------------------------------------------|-------|-------|------------------------------|
| <b>Human Beta Defensin 1</b>        | 33-68 | 1E4S   | 36 | DHYNCVSSGGQCLYSACPIFTKIQGTCY<br>RGKAKCC               | -4.3  | 0.22  | <i>Homo sapiens</i>          |
| <b>Human neutrophil peptide-2</b>   | 1-28  | 1ZMI   | 28 | CYCRIPACIAGERRYTCIYQGRWAFCC                           | -4.8  | 0.21  | <i>Homo sapiens</i>          |
| <b>Neutrophil defensin 2</b>        | 1-28  | 1ZMI   | 28 | CYCRIPACIAGERRYTCIYQGRWAFCC                           | -4.8  | 0.21  | <i>Homo sapiens</i>          |
| <b>Plectasin</b>                    | 1-40  | 3E7R   | 40 | GFGCNGPWEDDMQCHNHCKSIKGY<br>KGGYCAKGGFVCKCY           | -3.8  | 0.2   | N/A                          |
| <b>EP5-1</b>                        | 1-5   | P84182 | 5  | ACSAG                                                 | -4.5  | 0.20  | <i>Eisenia fetida</i>        |
| <b>Caerin 1.19</b>                  | 1-25  | POC2A8 | 25 | GLFKVLGSAKHLHPVAPIIAEKL                               | -4.3  | 0.20  | <i>Ranoidea gracilenta</i>   |
| <b>SLPI</b>                         | 1-50  | 2Z7F   | 50 | RRKPGKCPVITYGQCCGKSCCQGDMEC<br>CKLDRKCMGMFNPNMLVSPVKA | -4.3  | 0.20  | <i>Homo sapiens</i>          |
| <b>Human neutrophil peptide-3</b>   | 1-30  | 1DFN   | 30 | DCYCRIPACIAGERRYTCIYQGRWAF<br>CC                      | -5.1  | 0.20  | <i>Homo sapiens</i>          |
| <b>Defensin HNP-3</b>               | 1-30  | 1DFN   | 30 | DCYCRIPACIAGERRYTCIYQGRWAF<br>CC                      | -5.1  | 0.20  | <i>Homo sapiens</i>          |
| <b>Circulin B</b>                   | 1-31  | 2ERI   | 31 | CGESCVPICISTLLGCSCKNKVCYRNG<br>VIP                    | -4.3  | 0.19  | <i>Chassalia parviflora</i>  |
| <b>TEWP</b>                         | 1-36  | 2B5B   | 36 | EKKCPGRCTLKCGKHERPTLPYNCGK<br>YICCVPVKVK              | -4.3  | 0.19  | <i>Caretta caretta</i>       |
| <b>Human defensin 5</b>             | 1-32  | 1ZMP   | 32 | ATCYCRTGRCATRESLSGVCEISGRLYR<br>LCCR                  | -3.7  | 0.19  | <i>Homo sapiens</i>          |
| <b>Human defensin 6</b>             | 1-32  | 3QTE   | 32 | AFTCHCRRSCYSTEYSYGTCTVMGIN<br>WRFCC                   | -8.6  | 0.19  | <i>Homo sapiens</i>          |
| <b>Rabbit neutrophil defensin 3</b> | 1-32  | 1EWS   | 32 | MPCSCKKYCDPWEVIDGSCGLFNISKYI<br>CCREK                 | -4.5  | 0.19  | <i>Oryctolagus cuniculus</i> |
| <b>hAD 6 (H27W mutant)</b>          | 1-32  | 3QTE   | 32 | AFTCHCRRSCYSTEYSYGTCTVMGIN<br>WRFCC                   | -4.3  | 0.19  | <i>Homo sapiens</i>          |
| <b>Mytilin B</b>                    | 1-34  | 2EEM   | 34 | SCASRCKGHCRARRCGYVSVLYRGRG<br>YCKCLRC                 | -4.3  | 0.18  | N/A                          |
| <b>Human Beta Defensin 2</b>        | 28-64 | 1E4Q   | 37 | PVTCLKSGAICHVPFCPRRYKQIGTCGL<br>PGTKCKKP              | -3.9  | 0.16  | <i>Homo sapiens</i>          |
| <b>Elafin</b>                       | 1-50  | 2R3L   | 50 | AQEPVKGPVSTKPGSCCCRNPPNLM<br>ACCSGEGMACCPGIKDTDKLRIL  | -2.9  | 0.16  | <i>Homo sapiens</i>          |
| <b>Tricyclon A</b>                  | 1-33  | 1YP8   | 33 | CGESCFLGTCYTKGCSGKGLCYGTN<br>GGTIFD                   | -5.3  | 0.15  | <i>Viola tricolor</i>        |
| <b>Kalata B8</b>                    | 1-29  | 1K48   | 28 | GSVLNCGETLLGTCYTTGCTCNKYRV<br>CTKD                    | -5.1  | 0.14  | <i>Oldenlandia affinis</i>   |
| <b>Palicourein</b>                  | 1-37  | 1R1F   | 37 | TFCGETCRVIVCTYSAALGCTCDDRS<br>DGLCKRNGDP              | -4.2  | 0.14  | <i>Palicourea condensata</i> |
| <b>RatNP-1</b>                      | 1-30  | Q62716 | 30 | TCYCRTRCGFRERLSGACGYRRIYR<br>LCC                      | -4.3  | 0.13  | <i>Rattus norvegicus</i>     |
| <b>Vhl-1</b>                        | 1-31  | 1ZA8   | 31 | CGESCAMISFCFTEVIGCSCKNKVCYL<br>NSIS                   | -4.2  | 0.13  | <i>Viola hederacea</i>       |
| <b>Cycloviolacin O14</b>            | 1-31  | 2GJ0   | 31 | GSIPACGESCFKGCYTPGCSCSKYPLC<br>AKN                    | -5.3  | 0.13  | <i>Viola odorata</i>         |
| <b>RatNP-3</b>                      | 1-29  | Q62713 | 29 | CSCRTSSCRFGERLSGACRLNGRIYRLC<br>C                     | -4.3  | 0.10  | <i>Rattus norvegicus</i>     |
| <b>Kalata B2</b>                    | 1-29  | 1PT4   | 29 | CGETCFGGTCTNTPGCSTWPICTRDGL<br>PV                     | -5.2  | 0.10  | <i>Oldenlandia affinis</i>   |
| <b>Neutrophil defensin 4</b>        | 1-31  | 1ZMM   | 31 | VCSCRLVFCRRETLRVGNCLIGGVSTY<br>CCT                    | -4.7  | 0.10  | <i>Homo sapiens</i>          |
| <b>Human neutrophil peptide-4</b>   | 1-31  | 1ZMM   | 31 | VCSCRLVFCRRETLRVGNCLIGGVSTY<br>CCT                    | -4.7  | 0.097 | <i>Homo sapiens</i>          |
| <b>mBD-1</b>                        | 1-36  | P56386 | 36 | DQYKCLQHGGFCLRSSCPNKLQGTG<br>KPDKNPCK                 | -3.1  | 0.08  | <i>Mus musculus</i>          |
| <b>Kalata B1</b>                    | 1-29  | 4TTM   | 29 | GLPVCGETCVGGTCTNTPGCTCSWPVC<br>TRN                    | -6.0  | 0.07  | <i>Oldenlandia affinis</i>   |
| <b>Circulin A</b>                   | 1-30  | 1BH4   | 30 | CGESCWVIPCISAALGCSCKNKVCYRN<br>GIP                    | -3.9  | 0.07  | <i>Chassalia parviflora</i>  |
| <b>RNase 3 (alpha)</b>              | 6-35  | 1H1H   | 30 | FTRAQWFAIQHISLNPPRCTIAMRAIN<br>NYR                    | -10.8 | 0.07  | <i>Homo sapiens</i>          |
| <b>Human neutrophil peptide-1</b>   | 1-27  | 2PM1   | 27 | ACYCRIPACIAGEYGTCTIYQGLWAFCC                          | -4.7  | 0.07  | <i>Homo sapiens</i>          |
| <b>HNP1</b>                         | 1-27  | 2PM1   | 27 | ACYCRIPACIAGEYGTCTIYQGLWAFCC                          | -4.7  | 0.07  | <i>Homo sapiens</i>          |
| <b>Subtilosin A</b>                 | 1-37  | 1PXQ   | 37 | NKGCATCSIGAALVDGPIPDFEIAAG<br>LGLWG                   | -5.1  | 0.05  | <i>Bacillus subtilis</i>     |

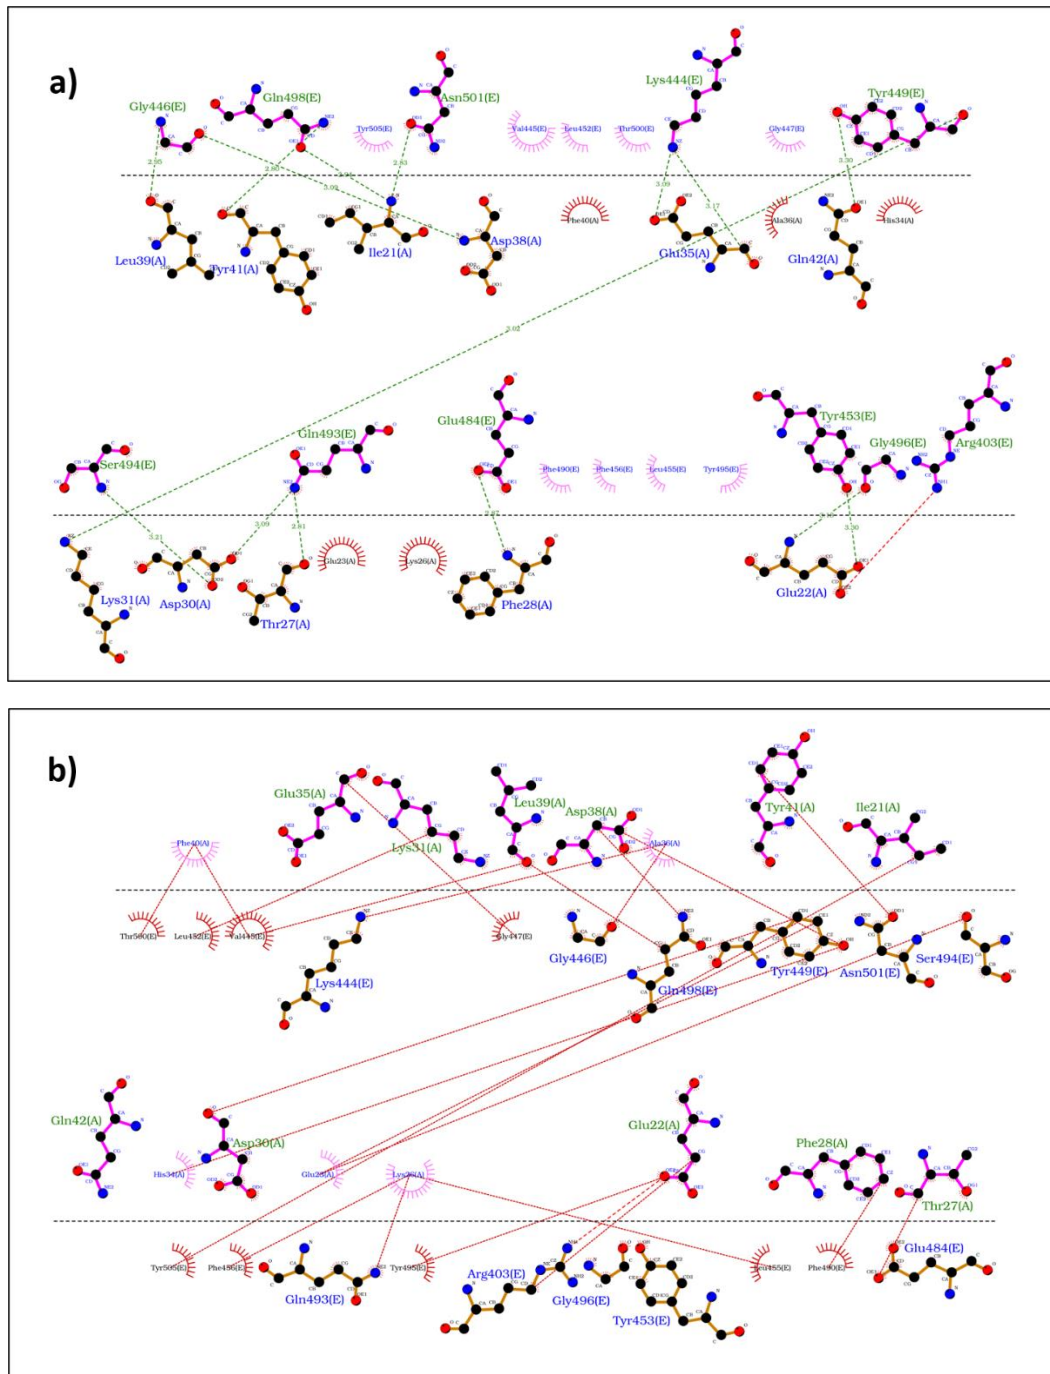

**Figure S1:** ACE2 docked to the SARS-CoV-2 RBD. (a) Interaction of amino acids by hydrogen bond (green dash line) and (b) representative hydrophobic interactions (red dash line) between ACE2 and RBD.



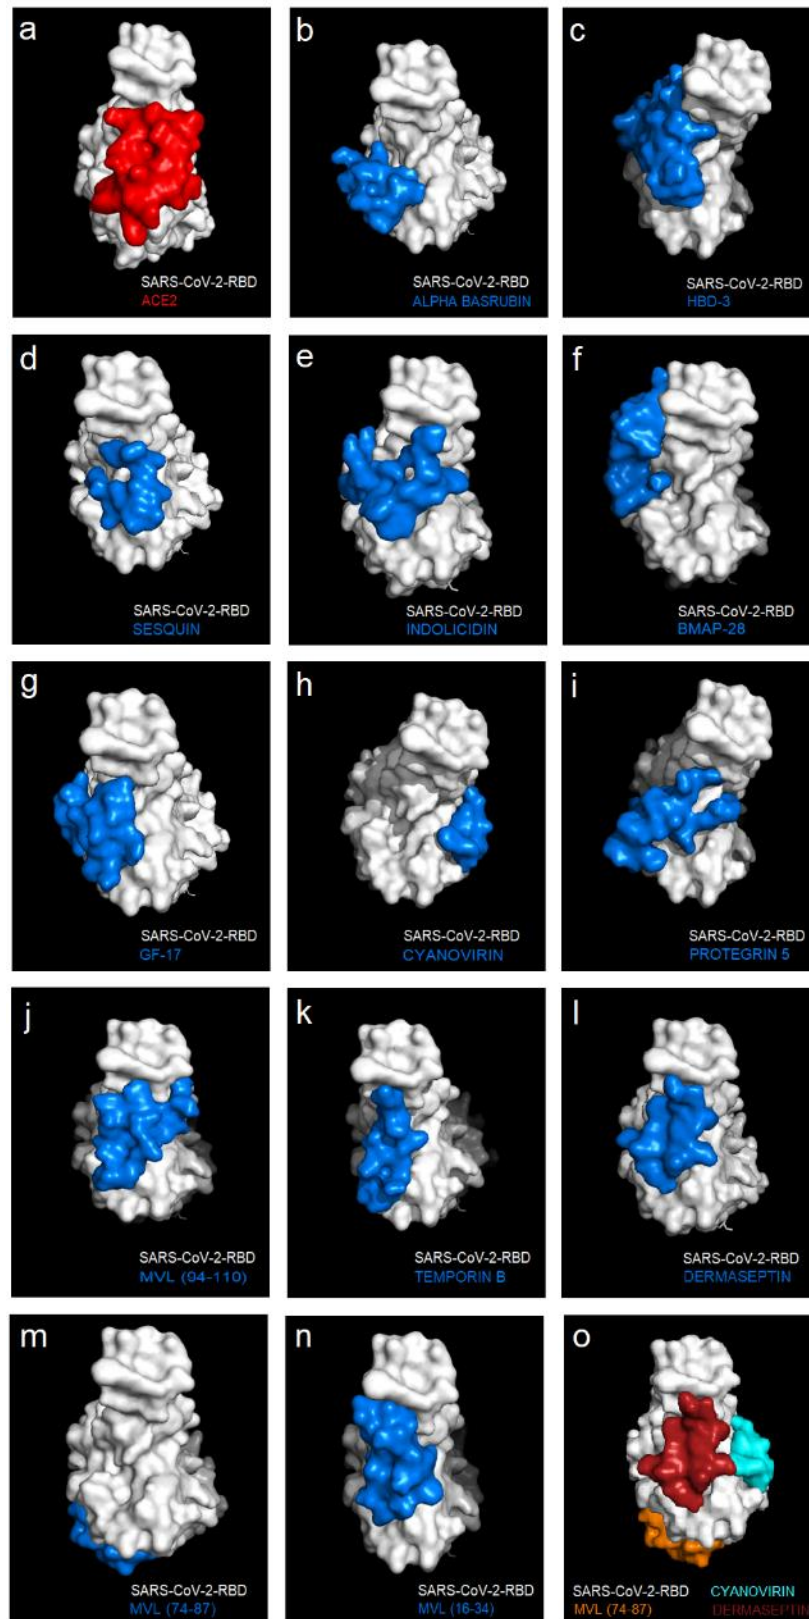

**Figure S2:** Peptide candidates (blue) docked to the SARS-CoV-2 RBD (white) with the highest binding affinities. (a) ACE2 (red). (b) Alpha basrubrin. (c) HBD-3. (d) Sesquin. (e) Indolicidin. (f) BMAP-28. (g) GF-17. (h) Cyanovirin. (i) Protegrin 5. (j) MVL 94-110. (k) Temporin-B. (l) Dermaseptin S4. (m) MVL (74-87). (n) MVL (16-34). (o) SARS-CoV-2 RBD (white) docked to three non-competing peptides.

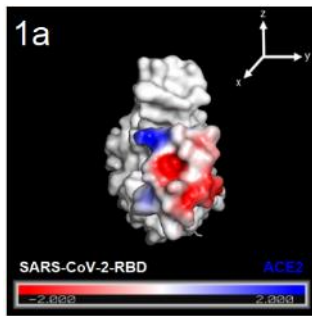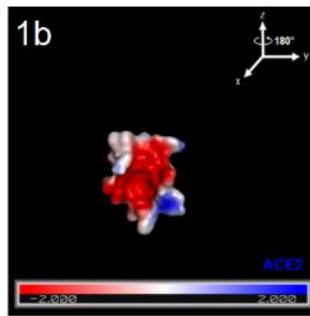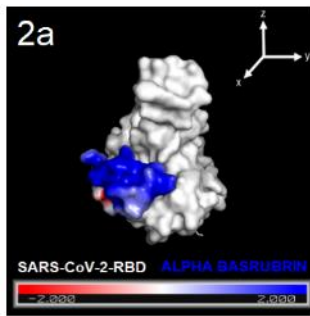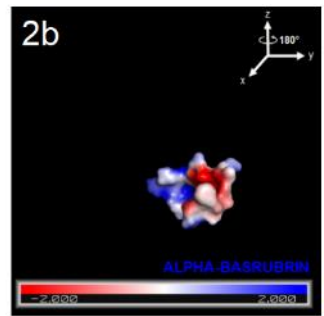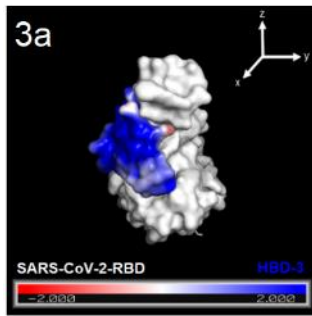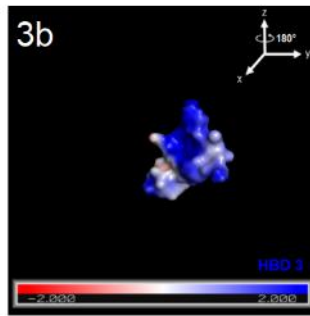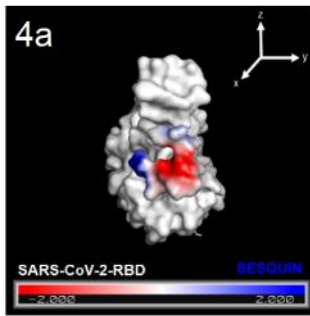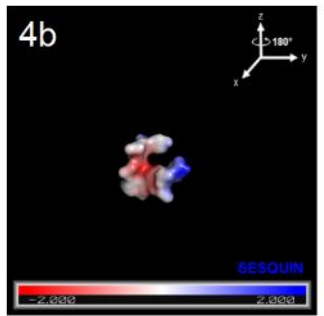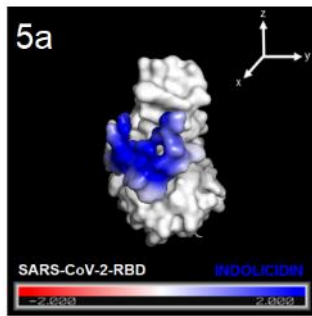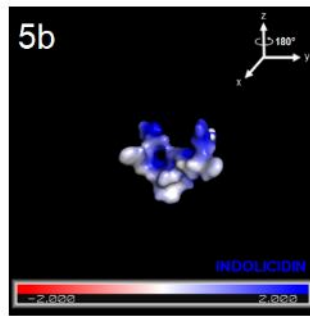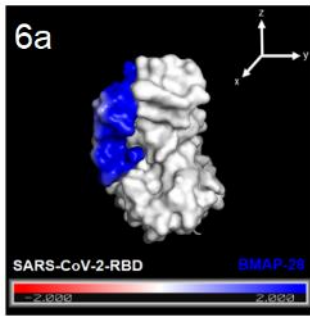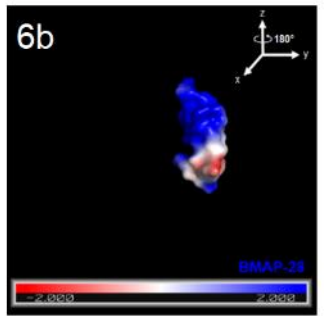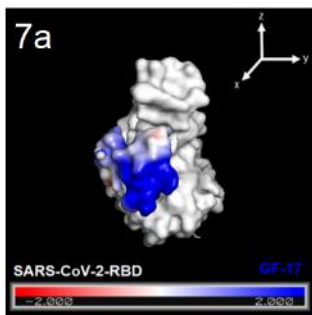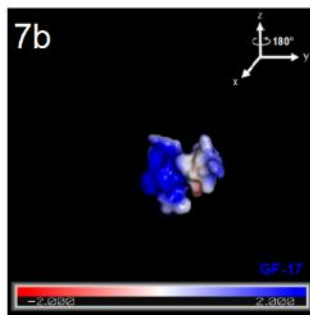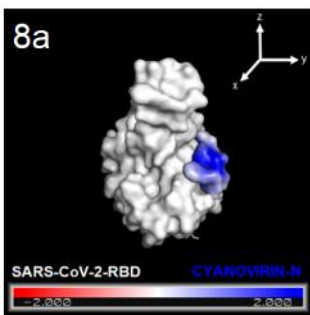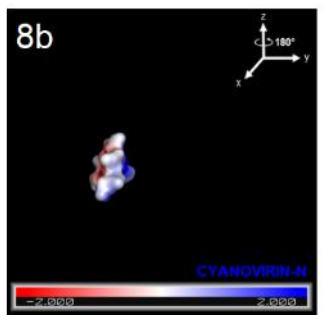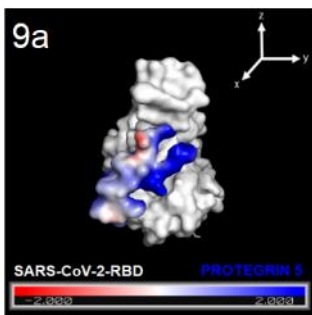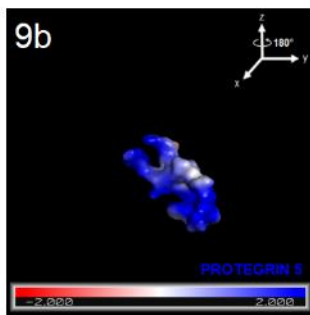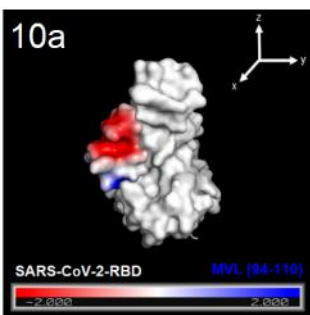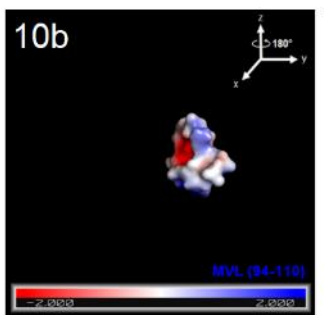

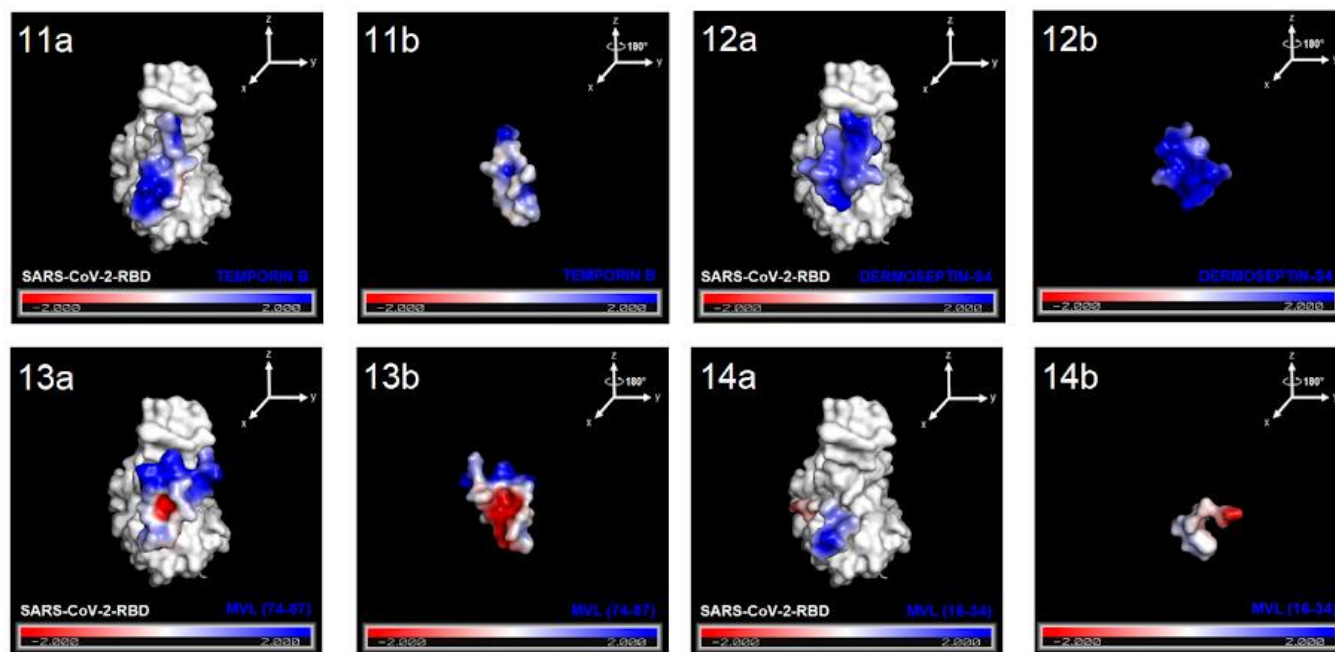

**Figure S3:** Distribution of electrostatic potential on the surface of APD peptide candidates docked in SARS-CoV-2 RBD. (1a,b) ACE2. (2a,b) Alpha basrubrin. (3a,b) HBD-3. (4a,b) Sesquin. (5a,b) Indolicidin. (6a,b) BMAP-28. (7a,b) GF-17. (8a,b) Cyanovirin-N (70–80). (9a,b) Protegrin 5. (10a,b) MVL (94–110). (11a,b) Temporin B. (12a,b) Dermaseptin-S4. (13a,b) MVL (74-87). (14a,b) MVL (16–34). The potential distribution was calculated by using the APBS module in PyMOL. The values range from  $-2$  (red) over  $0$  (white) to  $+2$  (blue). The orientation of the peptides in image (b) are rotated by about  $180^\circ$  along the  $z$ -axis of image (a) to show the peptide surface that binds to the RBD receptor.

**Table S3:** Hydrogen bonds and hydrophobic interactions of potential peptide candidates against SARS-CoV-2 RBD obtained by LigPlot+.

| Peptide               | Sequence fragment | PDB/<br>UNIPRO | Residues | Hydrogen bonds | Representative<br>hydrophobic<br>interactions | Isoelectric point<br>(pH) |
|-----------------------|-------------------|----------------|----------|----------------|-----------------------------------------------|---------------------------|
| Alpha Basrubrin       | 1-20              | P83186         | 20       | 19             | 30                                            | 6.34                      |
| Human Beta Defensin 3 | 27-44             | 1KJ6           | 19       | 18             | 30                                            | 10.41                     |
| Sesquin               | 1-10              | P84868         | 10       | 8              | 17                                            | 3.93                      |
| Indolicidin           | 1-13              | 1G89           | 13       | 10             | 31                                            | 12.13                     |
| BMAP-28               | 1-18              | 2NDC           | 18       | 14             | 28                                            | 11.91                     |
| GF-17                 | 1-17              | 2L5M           | 17       | 13             | 23                                            | 11.88                     |
| Cyanovirin-N (70-80)  | 70-80             | 2EZM           | 10       | 8              | 21                                            | 8.89                      |
| Protegrin 5           | 1-18              | 2NC7           | 18       | 13             | 21                                            | 9.67                      |
| MVL (94-110)          | 94-110            | 1ZHS           | 17       | 12             | 22                                            | 10.11                     |
| Temporin B            | 1-13              | 6GIL           | 13       | 9              | 19                                            | 10.12                     |
| Dermaseptin-S4        | 1-13              | 2DD6           | 13       | 9              | 18                                            | 11.17                     |
| MVL (74-87)           | 74-87             | 1ZHS           | 14       | 9              | 18                                            | 3.93                      |
| MVL (16-34)           | 16-34             | 1ZHS           | 19       | 12             | 31                                            | 7.86                      |
| ACE2                  | 21-44             | 6VYB           | 24       | 14             | 24                                            | 4.0                       |

**Table S4:** Immunogenicity analysis of peptides against Human MHC I to determine the number of alleles with IC50 < 50nM and IC50 < 500 nM concentrations.

| Peptide                | Sequence               | No. Alleles<br>IC50 < 50<br>nM | No. Alleles<br>50 < IC50 <<br>500 nM |
|------------------------|------------------------|--------------------------------|--------------------------------------|
| <b>L13</b>             | WLNHSNNQTWDDWIDQDTQD   | 0                              | 0                                    |
| <b>CD3</b>             | THDKTQHGGDQDQTTGQDWQQQ | 0                              | 0                                    |
| <b>H3</b>              | SGLTSWNDDNTQETWDQTTG   | 0                              | 0                                    |
| <b>P1</b>              | LWRLGPDQTWGPTKRGPDWQ   | 0                              | 0                                    |
| <b>P1a</b>             | THDLWDQDDDDTTGDYIQSQ   | 0                              | 0                                    |
| <b>P3a</b>             | THDLWRQDRDTGDRDYIQSQ   | 0                              | 0                                    |
| <b>P9</b>              | THRLWDQRRDTTDGSYIQSQ   | 0                              | 0                                    |
| <b>P13</b>             | THRLWDQRDTTGRQSYDISQ   | 0                              | 0                                    |
| <b>P14</b>             | THRLWRQRDTTGDSYIDQSQ   | 0                              | 0                                    |
| <b>P15</b>             | THRLWRQRDTTGDSYIDQSQ   | 0                              | 0                                    |
| <b>Cyanovirin-N</b>    | AAECKTRAQQ             | 0                              | 0                                    |
| <b>Sesquin</b>         | KTCENLADTY             | 0                              | 0                                    |
| <b>Alpha-Basrubrin</b> | GADFQECMKEHSQKQHQQG    | 0                              | 0                                    |
| <b>LD2</b>             | GLTQIQLNSLRRWDDTRRT    | 0                              | 1                                    |
| <b>CD2</b>             | THDKTQHGGDQRQTTGQDWQQQ | 0                              | 1                                    |
| <b>H1</b>              | SGLTSWNRRNTQETWRQTTG   | 0                              | 1                                    |
| <b>H2</b>              | SGLTSWNRNTQETWRQTTG    | 0                              | 1                                    |
| <b>P2a</b>             | THDLWRQDRDRTTGDYIQSQ   | 0                              | 1                                    |
| <b>P3</b>              | LDYGGNQLGGYTSLGGTDL    | 0                              | 1                                    |
| <b>P7</b>              | THRLWDQRDRDTTGRYIQSQ   | 0                              | 1                                    |
| <b>P8</b>              | THRLWDQRDRDTTGSYIQSQ   | 0                              | 1                                    |
| <b>P10</b>             | THRLWDQRDTRDGSYIQSQ    | 0                              | 1                                    |
| <b>P11</b>             | THRLWDQRDTTGRDSYIQSQ   | 0                              | 1                                    |
| <b>P12</b>             | THRLWDQRDTTGRQSYIDSQ   | 0                              | 1                                    |
| <b>LD3</b>             | GLTQIQLNSLDDWDDTDDT    | 1                              | 1                                    |
| <b>Temporin B</b>      | LLPIVGNLLKSLL          | 0                              | 1                                    |
| <b>MVL (74-87)</b>     | NDEAQLGPQIAAS          | 0                              | 1                                    |
| <b>L3</b>              | LSSQQTLDDWIDQDTGQDWY   | 0                              | 2                                    |
| <b>P4</b>              | NDYGGNQLGSGYTSLGGTDN   | 0                              | 2                                    |
| <b>P4a</b>             | THDLWRQDTGRDRDYIQSQ    | 0                              | 2                                    |
| <b>P17</b>             | THRLWRQRDTTGSDYDIWDSQ  | 0                              | 2                                    |
| <b>CD1</b>             | THRKTQHGGQRQTTGQRWQQQ  | 1                              | 2                                    |
| <b>L2</b>              | LSSQQTLDRWIRQDTGQDWY   | 1                              | 2                                    |
| <b>P16</b>             | THRLWRQRDTTGSDYDIQDSQ  | 1                              | 2                                    |
| <b>P8a</b>             | THDLWDQDTGSRTRYWQRIS   | 2                              | 2                                    |

|                         |             |                             |   |    |
|-------------------------|-------------|-----------------------------|---|----|
| <b>P9a</b>              |             | THDLWDQDTGSRTRYRQRIS        | 2 | 2  |
| <b>ACE2</b>             |             | IEEQAKTFLDKFNHEAEDLFYQSS    | 3 | 2  |
| <b>L12</b>              |             | WLNHSNNQTWDRWIDQRTQD        | 0 | 3  |
| <b>P5</b>               |             | NDYGGNQLDGGYTSLGGTDN        | 0 | 3  |
| <b>P6a</b>              |             | THDLWDQDTGRDTRYRYQSQ        | 0 | 3  |
| <b>P6</b>               |             | THRLWRQRRRTTGRYIQSQ         | 1 | 3  |
| <b>P7a</b>              |             | THDLWDQDTGSRTRYRIQSQ        | 1 | 3  |
| <b>P5a</b>              |             | THDLWDQDTGRTRTYIQSRQ        | 2 | 3  |
| <b>MVL (16-34)</b>      |             | AEAQQVGPKIAAAHQGNFT         | 0 | 3  |
| <b>GF-17</b>            |             | GFKRIVQRIKDFLRNLV           | 2 | 3  |
| <b>MVL (94-110)</b>     |             | GQWRTIVEGVMSVIQIK           | 5 | 3  |
| <b>Dermaseptin-S4</b>   |             | ALWKTLLKKVLKA               | 5 | 3  |
| <b>L11</b>              |             | WLNHSNNQTWRRWIRQRTQR        | 5 | 4  |
| <b>L1</b>               |             | LSSQQLRRWIRQRTGQRWY         | 5 | 5  |
| <b>Protegrin 5</b>      |             | RGGRLCYCRPRFCVCVGR          | 0 | 5  |
| <b>Indolicidin</b>      |             | ILPWKWPWWPWRR               | 1 | 5  |
| <b>Human Defensin 3</b> | <b>Beta</b> | EEQIGKCSTRGRKCCRRKK         | 0 | 6  |
| <b>P10a</b>             |             | DTHDLTDQWGSWGYRTQRISR       | 2 | 8  |
| <b>LD1</b>              |             | GLTQIQTLNSLRRWIRTRRT        | 5 | 10 |
| <b>BMAP-28</b>          |             | GGLRSLGRKILRAWKKYGPIVPIIRIG | 3 | 12 |

**Table S5:** Contact area of peptides docked on SARS-CoV-2 RBDDE and RBDM variants.

| <b>RBD<math>\delta</math></b> |           | <b>RBDM</b>                 |           |
|-------------------------------|-----------|-----------------------------|-----------|
| <b>OAP</b>                    | <b>Ac</b> | <b>OAP</b>                  | <b>Ac</b> |
| <b>P1</b>                     | 1039.78   | <b>P1</b>                   | 870.44    |
| <b>ACE2</b>                   | 1245.96   | <b>ACE2</b>                 | 1222.81   |
| <b>Cyanovirin-N (70-80)</b>   | 604.08    | <b>Cyanovirin-N (70-80)</b> | 670.43    |
| <b>Liso1_20</b>               | 919.27    | <b>Liso1_20</b>             | 4915.35   |
| <b>Liso111_130</b>            | 998.72    | <b>Liso111_130</b>          | 4984.20   |
| <b>Liso61_80</b>              | 732.16    | <b>Liso61_80</b>            | 4974.99   |
| <b>MVL (16-34)</b>            | 890.06    | <b>MVL (16-34)</b>          | 782.62    |
| <b>P10</b>                    | 924.60    | <b>P10</b>                  | 856.24    |
| <b>P11</b>                    | 984.05    | <b>P11</b>                  | 959.13    |
| <b>P12</b>                    | 1171.33   | <b>P12</b>                  | 791.97    |
| <b>P13</b>                    | 854.73    | <b>P13</b>                  | 938.85    |
| <b>P15</b>                    | 937.56    | <b>P15</b>                  | 1039.63   |
| <b>P17</b>                    | 1165.96   | <b>P17</b>                  | 856.47    |
| <b>P2a</b>                    | 770.42    | <b>P2a</b>                  | 957.17    |
| <b>P4a</b>                    | 1064.26   | <b>P4a</b>                  | 1093.94   |
| <b>P6a</b>                    | 944.48    | <b>P6a</b>                  | 1043.39   |
| <b>P7</b>                     | 1037.59   | <b>P7</b>                   | 941.23    |
| <b>P8</b>                     | 1118.28   | <b>P8</b>                   | 897.82    |
| <b>P9</b>                     | 841.20    | <b>P9</b>                   | 972.60    |
| <b>PH1</b>                    | 871.82    | <b>PH1</b>                  | 997.86    |
| <b>PH2</b>                    | 833.10    | <b>PH2</b>                  | 921.22    |
| <b>Sesquin</b>                | 641.88    | <b>Sesquin</b>              | 684.09    |
| <b>TemporinB</b>              | 681.97    | <b>TemporinB</b>            | 704.49    |
